# Supplementary material for: A series of bis-pyridyl-bis-amide-modulated metal–organic frameworks: formation, transformation and selectivity for the efficient detection of multiple analytes
Source: Royal Society of Chemistry journal article supplement (doi:10.1039/d2ce00915c), 2022-01-01
Supplement: d2ce00915c1.pdf [file d2ce00915c1.pdf]

Supplementary Material (ESI)

**Bis-pyridyl-bis-amide-modulated a series of metal-organic frameworks: Formation, transformation and selectivity for the efficient detection of multiple analytes**

Xiao-Sa Zhang,<sup>a</sup> Yan Liu,<sup>a</sup> Yu Liu,<sup>a</sup> Lin-Jiu Xiao,<sup>a\*</sup> Jia-Liang Cui,<sup>a</sup> Hong Xiang,<sup>a</sup> Jian Luan<sup>b\*</sup> and Wen-Ze Li<sup>a\*</sup>

<sup>a</sup> College of Science, Shenyang University of Chemical Technology, Shenyang, 110142, P. R. China

<sup>b</sup> College of Sciences, Northeastern University, Shenyang, 100819, P. R. China

E-mails: [x109@163.com](mailto:x109@163.com) (L. J. Xiao); [2010044@stu.neu.edu.cn](mailto:2010044@stu.neu.edu.cn) (J. Luan); [liwenz@syuct.edu.cn](mailto:liwenz@syuct.edu.cn) (W. Z. Li)

**Table S1.** Crystallographic data for complexes **1–4**.

| Complex                                                         | <b>1</b>                                                         | <b>2</b>                                                         | <b>3</b>                                                        | <b>4</b>                                                                        | <b>4a</b>                                                                      | <b>4b</b>                                                                      |
|-----------------------------------------------------------------|------------------------------------------------------------------|------------------------------------------------------------------|-----------------------------------------------------------------|---------------------------------------------------------------------------------|--------------------------------------------------------------------------------|--------------------------------------------------------------------------------|
| Empirical formula                                               | C <sub>26</sub> H <sub>20</sub> N <sub>4</sub> O <sub>7</sub> Zn | C <sub>26</sub> H <sub>22</sub> N <sub>4</sub> O <sub>8</sub> Zn | C <sub>26</sub> H <sub>18</sub> CdN <sub>4</sub> O <sub>6</sub> | C <sub>65</sub> H <sub>49</sub> Cd <sub>2</sub> N <sub>11</sub> O <sub>15</sub> | C <sub>55</sub> H <sub>43</sub> Cd <sub>2</sub> N <sub>9</sub> O <sub>13</sub> | C <sub>55</sub> H <sub>43</sub> Cu <sub>2</sub> N <sub>9</sub> O <sub>13</sub> |
| Formula weight                                                  | 565.83                                                           | 583.85                                                           | 594.84                                                          | 1448.95                                                                         | 1262.78                                                                        | 1165.06                                                                        |
| Crystal system                                                  | Triclinic                                                        | Orthorhombic                                                     | Triclinic                                                       | Triclinic                                                                       | Monoclinic                                                                     | Monoclinic                                                                     |
| Space group                                                     | <i>P</i> $\bar{1}$                                               | <i>C</i> <i>c</i> <i>c</i> <i>a</i>                              | <i>P</i> $\bar{1}$                                              | <i>P</i> $\bar{1}$                                                              | <i>P</i> 21/ <i>c</i>                                                          | <i>P</i> 21/ <i>c</i>                                                          |
| <i>a</i> (Å)                                                    | 7.9323(17)                                                       | 17.6671(6)                                                       | 4.9600(5)                                                       | 10.7737(9)                                                                      | 10.7456(5)                                                                     | 10.7796(7)                                                                     |
| <i>b</i> (Å)                                                    | 11.895(3)                                                        | 19.4948(6)                                                       | 10.1397(11)                                                     | 14.7826(11)                                                                     | 36.5825(16)                                                                    | 36.563(2)                                                                      |
| <i>c</i> (Å)                                                    | 12.694(3)                                                        | 15.5450(5)                                                       | 11.8715(12)                                                     | 20.3526(16)                                                                     | 15.7867(7)                                                                     | 15.8187(10)                                                                    |
| <i>α</i> (°)                                                    | 97.585(4)                                                        | 90                                                               | 67.798(2)                                                       | 90.830(2)                                                                       | 90                                                                             | 90                                                                             |
| <i>β</i> (°)                                                    | 101.921(4)                                                       | 90                                                               | 81.007(2)                                                       | 91.007(2)                                                                       | 98.1640(10)                                                                    | 97.9780(10)                                                                    |
| <i>γ</i> (°)                                                    | 94.309(4)                                                        | 90                                                               | 86.591(2)                                                       | 109.013(2)                                                                      | 90                                                                             | 90                                                                             |
| <i>V</i> (Å <sup>3</sup> )                                      | 1155.1(5)                                                        | 5354.0(3)                                                        | 545.99(10)                                                      | 3063.4(4)                                                                       | 6142.9(5)                                                                      | 6174.3(7)                                                                      |
| <i>Z</i>                                                        | 2                                                                | 8                                                                | 1                                                               | 2                                                                               | 4                                                                              | 4                                                                              |
| <i>D<sub>c</sub></i> (g cm <sup>-3</sup> )                      | 1.627                                                            | 1.449                                                            | 1.809                                                           | 1.571                                                                           | 1.365                                                                          | 1.253                                                                          |
| <i>R</i> <sub>int</sub>                                         | 0.0518                                                           | 0.0197                                                           | 0.0135                                                          | 0.0372                                                                          | 0.0295                                                                         | 0.0438                                                                         |
| GOF                                                             | 1.010                                                            | 1.059                                                            | 1.028                                                           | 1.074                                                                           | 1.047                                                                          | 1.043                                                                          |
| <i>R</i> <sub>1</sub> <sup>a</sup> [ <i>I</i> > 2σ( <i>I</i> )] | 0.0568                                                           | 0.0289                                                           | 0.0231                                                          | 0.0849                                                                          | 0.0580                                                                         | 0.0900                                                                         |
| <i>wR</i> <sub>2</sub> <sup>b</sup> (all data)                  | 0.1367                                                           | 0.0842                                                           | 0.0564                                                          | 0.2209                                                                          | 0.1550                                                                         | 0.2844                                                                         |

$$^a R_1 = \Sigma||F_o| - |F_c|| / \Sigma|F_o|, \quad ^b wR_2 = \Sigma[w(F_o^2 - F_c^2)^2] / \Sigma[w(F_o^2)^2]^{1/2}.$$

Supplementary Material (ESI)

**Table S2.** Selected bond distances (Å) and angles (°) for complex 1.

|                 |            |                  |            |
|-----------------|------------|------------------|------------|
| Zn(1)–O(1)      | 1.979(3)   | Zn(1)–O(3)       | 2.123(3)   |
| Zn(1)–N(1)      | 2.080(4)   | Zn(1)–O(4)       | 2.163(3)   |
| Zn(1)–N(2)      | 2.120(5)   | Zn(1)–C(23)      | 2.471(5)   |
| O(1)–Zn(1)–N(1) | 92.13(14)  | N(2)–Zn(1)–O(4)  | 94.07(16)  |
| O(1)–Zn(1)–N(2) | 96.71(15)  | O(3)–Zn(1)–O(4)  | 61.33(13)  |
| N(1)–Zn(1)–N(2) | 106.92(16) | O(1)–Zn(1)–C(23) | 138.33(17) |
| O(1)–Zn(1)–O(3) | 108.23(14) | N(1)–Zn(1)–C(23) | 118.44(16) |
| N(1)–Zn(1)–O(3) | 141.64(15) | N(2)–Zn(1)–C(23) | 100.03(16) |
| N(2)–Zn(1)–O(3) | 102.65(15) | O(3)–Zn(1)–C(23) | 30.73(15)  |
| O(1)–Zn(1)–O(4) | 166.55(16) | O(4)–Zn(1)–C(23) | 30.60(15)  |
| N(1)–Zn(1)–O(4) | 92.40(14)  |                  |            |

**Table S3.** Selected bond distances (Å) and angles (°) for complex 2.

|                     |            |                   |            |
|---------------------|------------|-------------------|------------|
| Zn(1)–O(1)#1        | 1.9601(11) | Zn(1)–N(1)#1      | 2.0747(12) |
| Zn(1)–O(1)          | 1.9601(11) | Zn(1)–N(1)        | 2.0748(12) |
| O(1)#1–Zn(1)–O(1)   | 133.29(8)  | O(1)#1–Zn(1)–N(1) | 106.26(5)  |
| O(1)#1–Zn(1)–N(1)#1 | 106.31(6)  | O(1)–Zn(1)–N(1)   | 106.32(6)  |
| O(1)–Zn(1)–N(1)#1   | 106.26(5)  | N(1)#1–Zn(1)–N(1) | 89.95(7)   |

Symmetry code: #1  $-x + 3/2, -y, z$ .

**Table S4.** Selected bond distances (Å) and angles (°) for complex 3.

|                     |            |                     |            |
|---------------------|------------|---------------------|------------|
| Cd(1)–N(1)#1        | 2.2597(15) | Cd(1)–O(1)#1        | 2.3196(14) |
| Cd(1)–N(1)          | 2.2597(15) | Cd(1)–O(2)#2        | 2.4154(13) |
| Cd(1)–O(1)          | 2.3196(14) | Cd(1)–O(2)#3        | 2.4154(13) |
| N(1)#1–Cd(1)–N(1)   | 180        | O(1)–Cd(1)–O(2)#2   | 84.19(6)   |
| N(1)#1–Cd(1)–O(1)   | 92.05(6)   | O(1)#1–Cd(1)–O(2)#2 | 95.81(6)   |
| N(1)–Cd(1)–O(1)     | 87.95(6)   | N(1)#1–Cd(1)–O(2)#3 | 87.25(5)   |
| N(1)#1–Cd(1)–O(1)#1 | 87.95(6)   | N(1)–Cd(1)–O(2)#3   | 92.75(5)   |
| N(1)–Cd(1)–O(1)#1   | 92.05(6)   | O(1)–Cd(1)–O(2)#3   | 95.81(6)   |
| O(1)–Cd(1)–O(1)#1   | 180        | O(1)#1–Cd(1)–O(2)#3 | 84.19(6)   |
| N(1)#1–Cd(1)–O(2)#2 | 92.75(5)   | O(2)#2–Cd(1)–O(2)#3 | 180        |
| N(1)–Cd(1)–O(2)#2   | 87.25(5)   |                     |            |

Symmetry codes: #1  $-x, -y, -z$ ; #2  $x - 1, y, z$ ; #3  $-x + 1, -y, -z$ .

## Supplementary Material (ESI)

**Table S5.** Selected bond distances (Å) and angles (°) for complex 4.

|                 |            |                     |            |
|-----------------|------------|---------------------|------------|
| Cd(1)–N(2)      | 2.297(8)   | Cd(2)–O(6)#1        | 2.303(5)   |
| Cd(1)–O(8)      | 2.324(5)   | Cd(2)–N(3)          | 2.314(6)   |
| Cd(1)–N(1)      | 2.325(7)   | Cd(2)–N(4)          | 2.328(6)   |
| Cd(1)–O(5)      | 2.368(5)   | Cd(2)–O(3)          | 2.365(5)   |
| Cd(1)–O(1)      | 2.396(5)   | Cd(2)–O(7)#1        | 2.371(5)   |
| Cd(1)–O(2)      | 2.433(5)   | Cd(2)–O(4)          | 2.424(5)   |
| Cd(1)–O(7)      | 2.645(5)   | Cd(2)–C(44)         | 2.742(6)   |
| N(2)–Cd(1)–O(8) | 90.6(3)    | O(6)#1–Cd(2)–N(3)   | 89.9(2)    |
| N(2)–Cd(1)–N(1) | 178.5(3)   | O(6)#1–Cd(2)–N(4)   | 89.7(2)    |
| O(8)–Cd(1)–N(1) | 89.0(2)    | N(3)–Cd(2)–N(4)     | 176.8(2)   |
| N(2)–Cd(1)–O(5) | 92.8(2)    | O(6)#1–Cd(2)–O(3)   | 88.18(18)  |
| O(8)–Cd(1)–O(5) | 135.8(2)   | N(3)–Cd(2)–O(3)     | 90.7(2)    |
| N(1)–Cd(1)–O(5) | 86.4(2)    | N(4)–Cd(2)–O(3)     | 92.5(2)    |
| N(2)–Cd(1)–O(1) | 91.1(2)    | O(6)#1–Cd(2)–O(7)#1 | 134.81(19) |
| O(8)–Cd(1)–O(1) | 86.71(19)  | N(3)–Cd(2)–O(7)#1   | 92.3(2)    |
| N(1)–Cd(1)–O(1) | 90.3(2)    | N(4)–Cd(2)–O(7)#1   | 85.7(2)    |
| O(5)–Cd(1)–O(1) | 137.18(19) | O(3)–Cd(2)–O(7)#1   | 136.88(17) |
| N(2)–Cd(1)–O(2) | 92.3(3)    | O(6)#1–Cd(2)–O(4)   | 142.34(19) |
| O(8)–Cd(1)–O(2) | 140.28(19) | N(3)–Cd(2)–O(4)     | 92.4(2)    |
| N(1)–Cd(1)–O(2) | 88.9(2)    | N(4)–Cd(2)–O(4)     | 89.8(2)    |
| O(5)–Cd(1)–O(2) | 83.6(2)    | O(3)–Cd(2)–O(4)     | 54.24(17)  |
| O(1)–Cd(1)–O(2) | 53.65(18)  | O(7)#1–Cd(2)–O(4)   | 82.65(18)  |
| N(2)–Cd(1)–O(7) | 84.4(2)    | O(6)#1–Cd(2)–C(44)  | 115.4(2)   |
| O(8)–Cd(1)–O(7) | 51.57(18)  | N(3)–Cd(2)–C(44)    | 92.0(2)    |
| N(1)–Cd(1)–O(7) | 94.2(2)    | N(4)–Cd(2)–C(44)    | 91.1(2)    |
| O(5)–Cd(1)–O(7) | 84.96(18)  | O(3)–Cd(2)–C(44)    | 27.31(18)  |
| O(1)–Cd(1)–O(7) | 137.85(17) | O(7)#1–Cd(2)–C(44)  | 109.6(2)   |
| O(2)–Cd(1)–O(7) | 167.93(18) | O(4)–Cd(2)–C(44)    | 26.93(19)  |

Symmetry code: #1  $x, y - 1, z$ .

## Supplementary Material (ESI)

**Table S6.** Selected bond distances (Å) and angles (°) for complex **4a**.

|                      |            |                    |            |
|----------------------|------------|--------------------|------------|
| Cd(1)–O(2)#1         | 2.275(4)   | Cd(2)–O(13)        | 2.352(4)   |
| Cd(1)–O(1)           | 2.329(4)   | Cd(2)–N(4)#2       | 2.355(3)   |
| Cd(1)–N(1)           | 2.344(4)   | Cd(2)–O(3)         | 2.371(3)   |
| Cd(1)–N(2)#2         | 2.350(4)   | Cd(2)–O(6)         | 2.382(4)   |
| Cd(1)–O(8)#3         | 2.379(3)   | Cd(2)–O(5)         | 2.416(4)   |
| Cd(1)–O(7)#3         | 2.412(3)   | Cd(2)–O(4)         | 2.455(3)   |
| Cd(1)–C(52)#3        | 2.733(4)   | Cd(2)–C(45)        | 2.736(4)   |
| Cd(2)–N(3)           | 2.322(4)   | Cd(2)–C(44)        | 2.747(4)   |
| O(2)#1–Cd(1)–O(1)    | 121.11(13) | N(4)#2–Cd(2)–O(6)  | 92.66(14)  |
| O(2)#1–Cd(1)–N(1)    | 93.96(15)  | O(3)–Cd(2)–O(6)    | 79.22(12)  |
| O(1)–Cd(1)–N(1)      | 87.77(15)  | N(3)–Cd(2)–O(5)    | 91.25(14)  |
| O(2)#1–Cd(1)–N(2)#2  | 94.88(15)  | O(13)–Cd(2)–O(5)   | 87.77(15)  |
| O(1)–Cd(1)–N(2)#2    | 87.92(15)  | N(4)#2–Cd(2)–O(5)  | 89.76(13)  |
| N(1)–Cd(1)–N(2)#2    | 171.15(15) | O(3)–Cd(2)–O(5)    | 133.31(13) |
| O(2)#1–Cd(1)–O(8)#3  | 139.65(13) | O(6)–Cd(2)–O(5)    | 54.47(13)  |
| O(1)–Cd(1)–O(8)#3    | 99.25(12)  | N(3)–Cd(2)–O(4)    | 85.86(13)  |
| N(1)–Cd(1)–O(8)#3    | 86.91(13)  | O(13)–Cd(2)–O(4)   | 84.83(14)  |
| N(2)#2–Cd(1)–O(8)#3  | 86.16(13)  | N(4)#2–Cd(2)–O(4)  | 91.94(12)  |
| O(2)#1–Cd(1)–O(7)#3  | 85.19(12)  | O(3)–Cd(2)–O(4)    | 53.91(11)  |
| O(1)–Cd(1)–O(7)#3    | 153.58(12) | O(6)–Cd(2)–O(4)    | 133.04(12) |
| N(1)–Cd(1)–O(7)#3    | 87.82(14)  | O(5)–Cd(2)–O(4)    | 172.15(12) |
| N(2)#2–Cd(1)–O(7)#3  | 92.62(14)  | N(3)–Cd(2)–C(45)   | 93.33(14)  |
| O(8)#3–Cd(1)–O(7)#3  | 54.50(12)  | O(13)–Cd(2)–C(45)  | 115.28(17) |
| O(2)#1–Cd(1)–C(52)#3 | 112.52(14) | N(4)#2–Cd(2)–C(45) | 91.80(13)  |
| O(1)–Cd(1)–C(52)#3   | 126.37(14) | O(3)–Cd(2)–C(45)   | 105.94(14) |
| N(1)–Cd(1)–C(52)#3   | 87.89(14)  | O(6)–Cd(2)–C(45)   | 26.93(15)  |
| N(2)#2–Cd(1)–C(52)#3 | 88.45(14)  | O(5)–Cd(2)–C(45)   | 27.55(15)  |
| O(8)#3–Cd(1)–C(52)#3 | 27.13(13)  | O(4)–Cd(2)–C(45)   | 159.84(14) |
| O(7)#3–Cd(1)–C(52)#3 | 27.39(13)  | N(3)–Cd(2)–C(44)   | 84.52(14)  |
| N(3)–Cd(2)–O(13)     | 87.77(15)  | O(13)–Cd(2)–C(44)  | 111.55(15) |
| N(3)–Cd(2)–N(4)#2    | 170.79(14) | N(4)#2–Cd(2)–C(44) | 97.54(13)  |
| O(13)–Cd(2)–N(4)#2   | 83.12(15)  | O(3)–Cd(2)–C(44)   | 27.13(12)  |
| N(3)–Cd(2)–O(3)      | 87.15(14)  | O(6)–Cd(2)–C(44)   | 106.35(13) |
| O(13)–Cd(2)–O(3)     | 138.68(14) | O(5)–Cd(2)–C(44)   | 159.97(14) |
| N(4)#2–Cd(2)–O(3)    | 98.79(14)  | O(4)–Cd(2)–C(44)   | 26.86(12)  |
| N(3)–Cd(2)–O(6)      | 95.37(14)  | C(45)–Cd(2)–C(44)  | 133.00(15) |
| O(13)–Cd(2)–O(6)     | 142.10(15) |                    |            |

Symmetry codes: #1  $-x, -y + 1, -z$ ; #2  $x - 1, y, z + 1$ ; #3  $x + 1, -y + 1/2, z + 1/2$ .

Supplementary Material (ESI)

**Table S7.** Selected bond distances (Å) and angles (°) for complex **4b**.

|                     |          |                     |          |
|---------------------|----------|---------------------|----------|
| Cu(1)–O(1)          | 2.275(7) | Cu(2)–N(2)#1        | 2.328(8) |
| Cu(1)–N(6)#1        | 2.328(8) | Cu(2)–O(13)         | 2.356(8) |
| Cu(1)–N(5)          | 2.333(7) | Cu(2)–O(4)#4        | 2.375(7) |
| Cu(1)–O(2)#2        | 2.341(8) | Cu(2)–O(6)          | 2.379(7) |
| Cu(1)–O(7)          | 2.386(6) | Cu(2)–O(5)          | 2.426(7) |
| Cu(1)–O(8)          | 2.409(7) | O(2)–Cu(1)#2        | 2.341(7) |
| N(1)–Cu(2)          | 2.355(7) | O(4)–Cu(2)#5        | 2.375(7) |
| N(2)–Cu(2)#3        | 2.329(8) | N(6)–Cu(1)#3        | 2.328(8) |
| O(1)–Cu(1)–N(6)#1   | 93.6(3)  | N(2)#1–Cu(2)–N(1)   | 170.1(3) |
| O(1)–Cu(1)–N(5)     | 94.8(3)  | N(2)#1–Cu(2)–O(13)  | 87.2(3)  |
| N(6)#1–Cu(1)–N(5)   | 171.6(3) | N(1)–Cu(2)–O(13)    | 83.3(3)  |
| O(1)–Cu(1)–O(2)#2   | 121.3(2) | N(2)#1–Cu(2)–O(4)#4 | 87.5(3)  |
| N(6)#1–Cu(1)–O(2)#2 | 88.5(3)  | N(1)–Cu(2)–O(4)#4   | 97.9(3)  |
| N(5)–Cu(1)–O(2)#2   | 87.7(3)  | O(13)–Cu(2)–O(4)#4  | 138.3(3) |
| O(1)–Cu(1)–O(7)     | 139.4(3) | N(2)#1–Cu(2)–O(6)   | 96.1(3)  |
| N(6)#1–Cu(1)–O(7)   | 86.9(3)  | N(1)–Cu(2)–O(6)     | 93.2(3)  |
| N(5)–Cu(1)–O(7)     | 86.3(3)  | O(13)–Cu(2)–O(6)    | 143.0(3) |
| O(2)#2–Cu(1)–O(7)   | 99.3(2)  | O(4)#4–Cu(2)–O(6)   | 78.7(2)  |
| O(1)–Cu(1)–O(8)     | 84.3(2)  | N(2)#1–Cu(2)–O(5)   | 92.1(3)  |
| N(6)#1–Cu(1)–O(8)   | 87.9(3)  | N(1)–Cu(2)–O(5)     | 90.2(3)  |
| N(5)–Cu(1)–O(8)     | 92.2(3)  | O(13)–Cu(2)–O(5)    | 87.8(3)  |
| O(2)#2–Cu(1)–O(8)   | 154.3(2) | O(4)#4–Cu(2)–O(5)   | 133.7(3) |
| O(7)–Cu(1)–O(8)     | 55.1(2)  | O(6)–Cu(2)–O(5)     | 55.3(2)  |

Symmetry codes: #1  $x + 1, y, z - 1$ ; #2  $-x, -y + 1, -z + 1$ ; #3  $x - 1, y, z + 1$ ; #4  $-x + 1, y - 1/2, -z + 3/2$ ; #5  $-x + 1, y + 1/2, -z + 3/2$ .

Supplementary Material (ESI)

**Table S8**  $K_{sv}$  values and LOD of complexes **1–4** for different analytes.

| Analyte                                      | Complex 1                   |                       | Complex 2                   |                       | Complex 3                   |                       | Complex 4                   |                       |
|----------------------------------------------|-----------------------------|-----------------------|-----------------------------|-----------------------|-----------------------------|-----------------------|-----------------------------|-----------------------|
|                                              | $K_{sv}$ ( $M^{-1}$ )<br>1) | LOD (M)               |
| Fe <sup>3+</sup>                             | $1.38 \times 10^4$          | $1.41 \times 10^{-4}$ | $1.10 \times 10^4$          | $1.62 \times 10^{-4}$ | $1.27 \times 10^4$          | $5.63 \times 10^{-5}$ | $2.89 \times 10^3$          | $2.03 \times 10^{-4}$ |
| CrO <sub>4</sub> <sup>2-</sup>               | $6.69 \times 10^3$          | $7.80 \times 10^{-4}$ | $4.63 \times 10^3$          | $1.26 \times 10^{-4}$ | $6.87 \times 10^4$          | $2.20 \times 10^{-2}$ | $4.52 \times 10^2$          | $2.63 \times 10^{-5}$ |
| Cr <sub>2</sub> O <sub>7</sub> <sup>2-</sup> | $5.43 \times 10^3$          | $3.63 \times 10^{-5}$ | $6.80 \times 10^4$          | $1.98 \times 10^{-4}$ | $4.26 \times 10^4$          | $1.21 \times 10^{-2}$ | $2.36 \times 10^4$          | $3.11 \times 10^{-5}$ |
| MnO <sub>4</sub> <sup>-</sup>                | $6.99 \times 10^3$          | $1.09 \times 10^{-3}$ | $3.88 \times 10^4$          | $4.03 \times 10^{-5}$ | $4.77 \times 10^4$          | $8.79 \times 10^{-4}$ | $5.73 \times 10^2$          | $3.17 \times 10^{-4}$ |
| DMSO                                         | $3.70 \times 10^3$          | $1.21 \times 10^{-3}$ | $1.36 \times 10^3$          | $1.40 \times 10^{-2}$ | $1.06 \times 10^3$          | $8.02 \times 10^{-3}$ | $0.92 \times 10^2$          | $2.68 \times 10^{-3}$ |
| NB                                           | $1.65 \times 10^3$          | $5.71 \times 10^{-3}$ | $1.71 \times 10^3$          | $2.25 \times 10^{-2}$ | $9.75 \times 10^2$          | $9.45 \times 10^{-3}$ | $2.38 \times 10^2$          | $1.35 \times 10^{-2}$ |
| NM                                           | $2.82 \times 10^3$          | $4.69 \times 10^{-3}$ | $1.89 \times 10^3$          | $2.29 \times 10^{-2}$ | $9.75 \times 10^2$          | $1.22 \times 10^{-2}$ | $2.39 \times 10^2$          | $4.61 \times 10^{-3}$ |
| AH                                           | $1.26 \times 10^3$          | $1.35 \times 10^{-2}$ | $1.11 \times 10^3$          | $4.63 \times 10^{-2}$ | $7.87 \times 10^2$          | $1.41 \times 10^{-2}$ | $1.65 \times 10^2$          | $2.26 \times 10^{-2}$ |

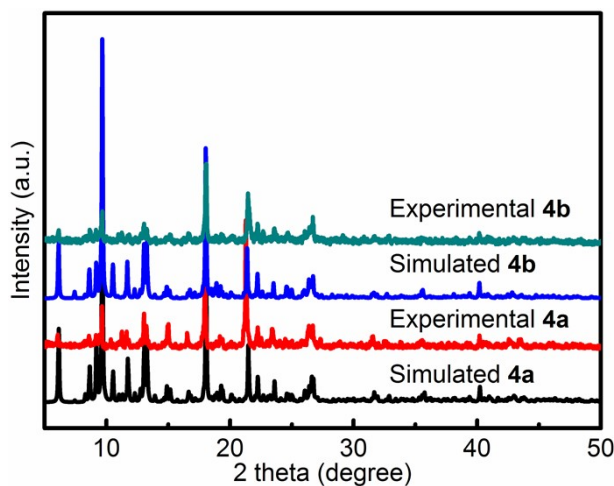

**Fig. S1** The PXRD patterns for complexes **4a** and **4b**.

## Supplementary Material (ESI)

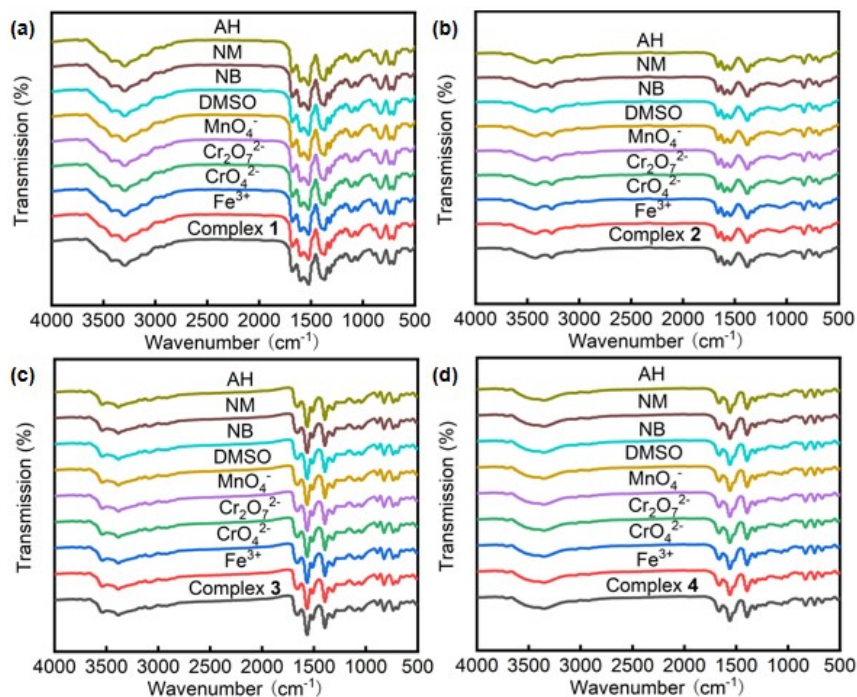

**Fig. S2** The IR spectra of complexes 1–4 before and after being soaked in different analytes.

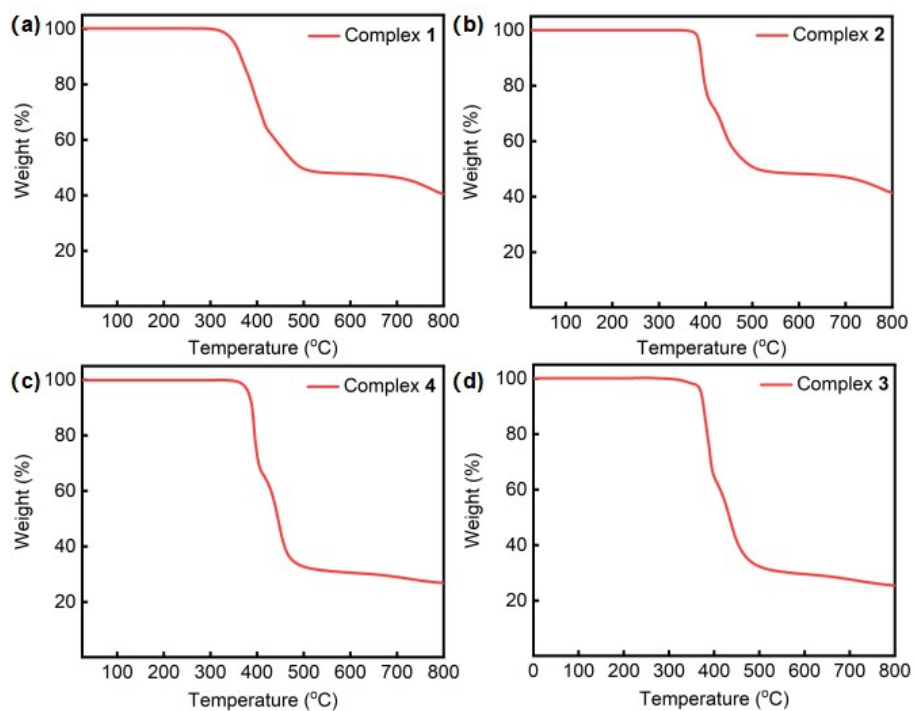

**Fig. S3** The TG curves of complexes 1–4.

Supplementary Material (ESI)

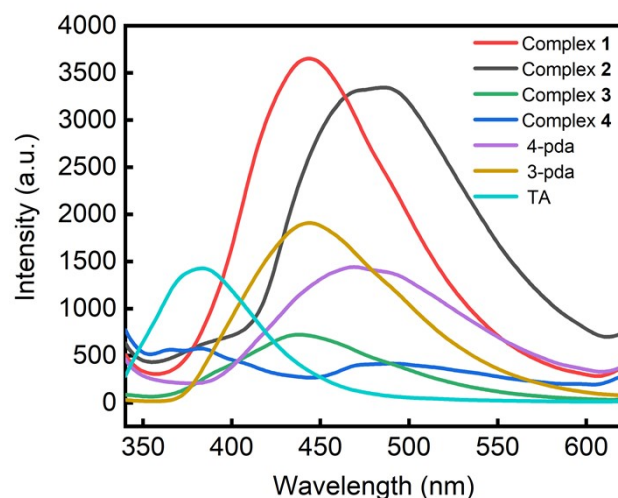

Fig. S4 The emission spectra of the ligands and complexes 1–4.

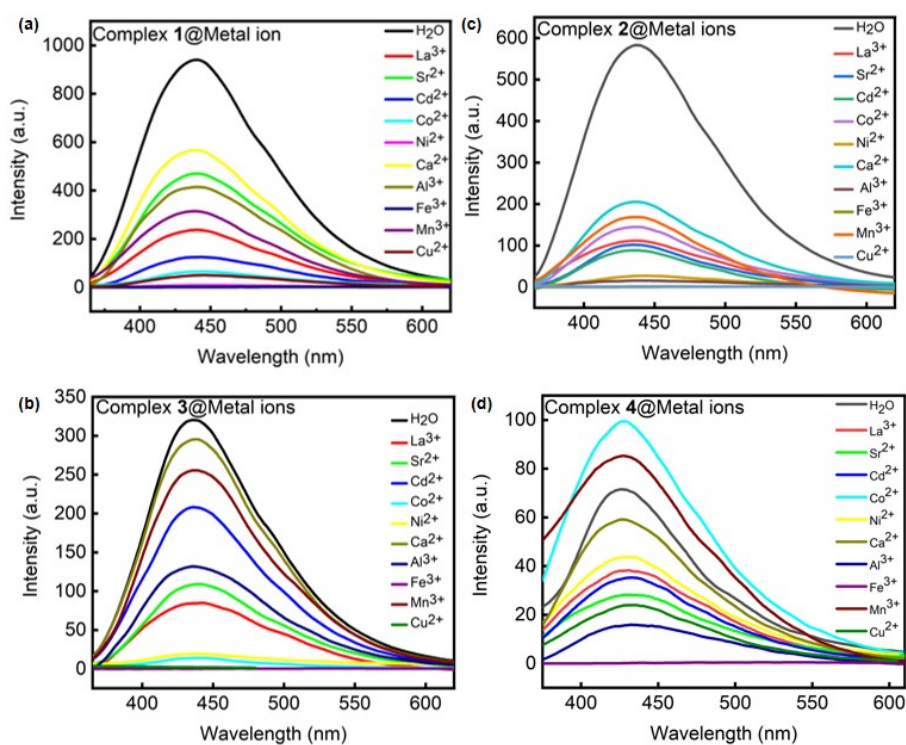

Fig. S5 Luminescence spectra of complexes 1–4 in different metal ion solutions.



## Supplementary Material (ESI)

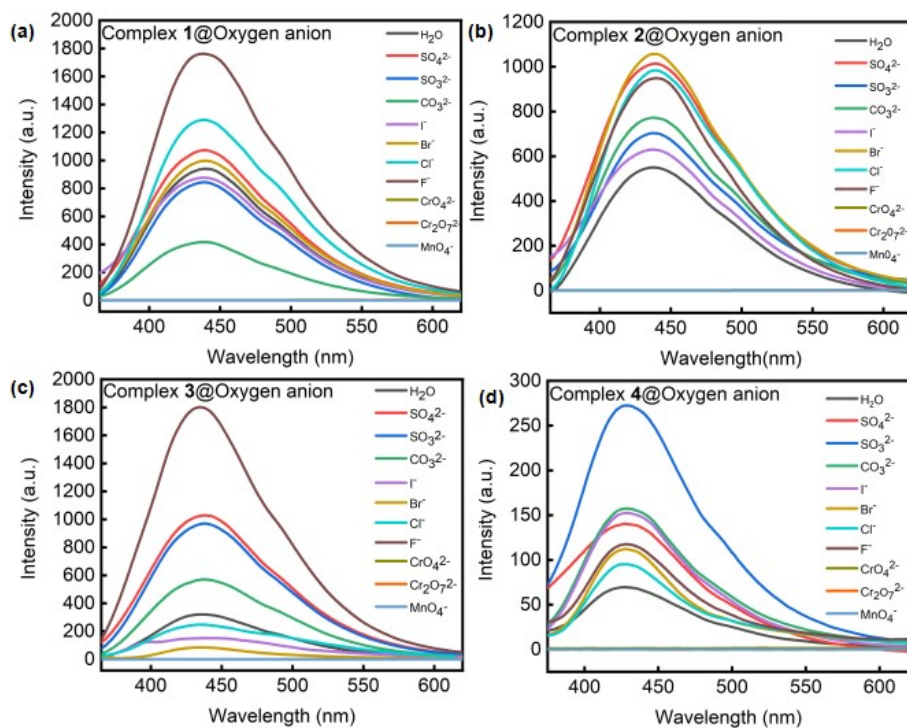

**Fig. S6** Luminescence spectra of complexes 1–4 after the addition of various metal cations.

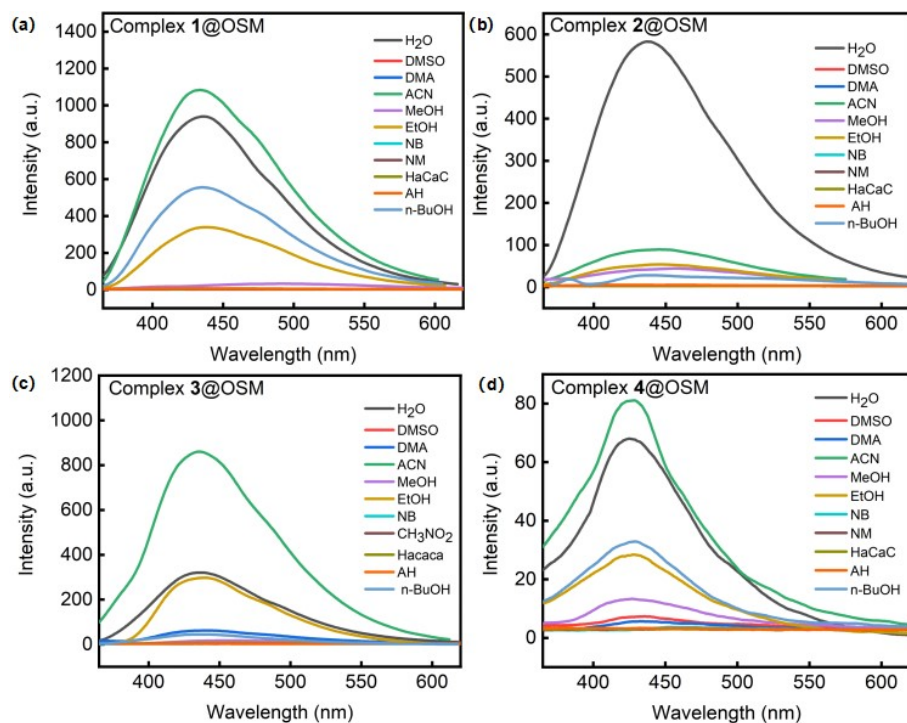

**Fig. S7** Luminescence spectra of complexes 1–4 after the addition of various oxygen anions.

## Supplementary Material (ESI)

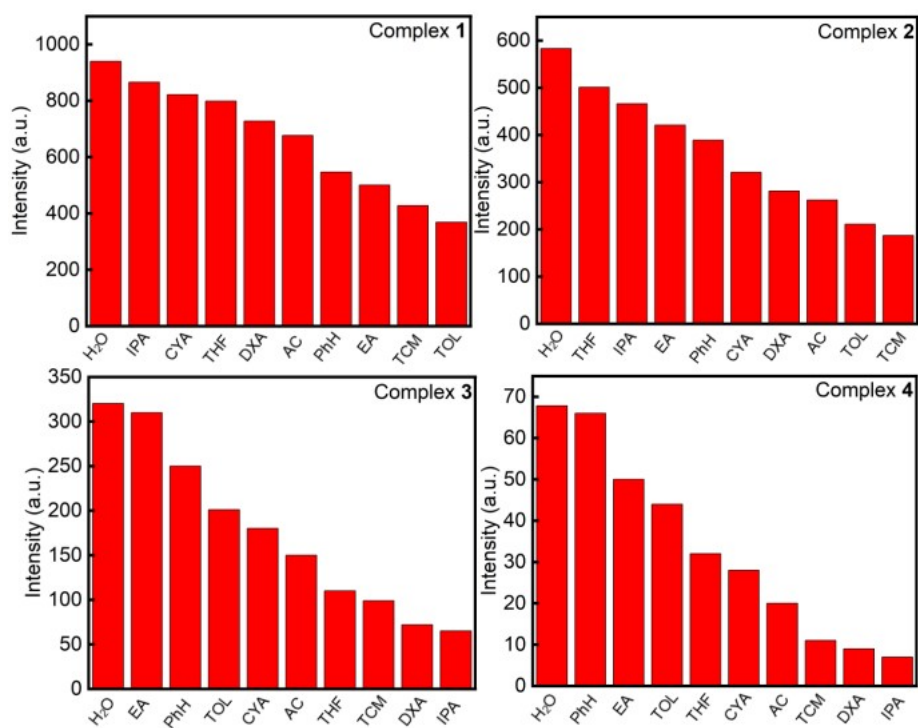

**Fig. S8** Fluorescence spectra of complexes 1–4 after the addition of some other aromatic solvents.
